# Supplementary material for: The importance of vegetation density for tourists’ wildlife viewing experience and satisfaction in African savannah ecosystems
Source: PLOS journal article supplement (doi:10.1371/journal.pone.0185793), 2017-09-28
Supplement: S2 (10.1371/journal.pone.0185793.s002) [file journal.pone.0185793.s002.pdf]

## S2 Methods

Date \_\_\_\_\_ Time \_\_\_\_\_ Interview/Map ID \_\_\_\_\_

Location: \_\_\_\_\_

Interviewer: \_\_\_\_\_

Interview language: \_\_\_\_\_

### SECTION I: Visit details

- a. Where are you from? \_\_\_\_\_
- b. For how long are you staying in the park? \_\_\_\_\_
- c. Is it your first stay in the Park? \_\_\_\_\_
- d. If not, how many times have you been here before? \_\_\_\_\_
- e. At which Camp are you staying? \_\_\_\_\_
- f. Have you been staying in this Camp all the time or have you been staying elsewhere in the park on this trip?  
\_\_\_\_\_
- g. Accommodation type (camping, hut, lodge etc.)? \_\_\_\_\_
- h. Are you travelling on your own or in a group? \_\_\_\_\_
- i. Is your trip self-organized or by a tour operator? \_\_\_\_\_
- j. What is the main reason(s) behind your visit to this Park (not more than 3)?

1. \_\_\_\_\_
2. \_\_\_\_\_
3. \_\_\_\_\_

### SECTION II: DRIVING ROUTE AND PERSONAL PREFERENCES

- I. Did you do a (game) drive today in the park?
  - a. If no: What else did you do? \_\_\_\_\_  
Was there any reason for doing so? \_\_\_\_\_
  - b. If yes: Did you go by yourself or did you join a guided tour? (maybe time/ start of tour/name of guide) \_\_\_\_\_
  - c. For how long have you been on the (game) drive?  
\_\_\_\_\_
- II. Where in the park did you go to?

a. Can you please show on this map (**provided by interviewer**) where you went?  
Please mark/indicate approximately the route (if possible).

b. Was there any particular reason for going to this area in the park or for booking this game drive? \_\_\_\_\_

c. Which were your topmost expectations (not more than 3) for that day?

1. \_\_\_\_\_

2. \_\_\_\_\_

3. \_\_\_\_\_

d. Have your expectations been met? (On a scale from 1 to 10, 1 being not met at all, 10 being absolutely met) \_\_\_\_\_

e. Can you rank the following park features by order of importance (from 1-5)?

Landscape uniqueness \_\_\_\_\_

Wildlife viewing \_\_\_\_\_

Calm and quietness \_\_\_\_\_

Luxury of some accommodations \_\_\_\_\_

Botany \_\_\_\_\_

f. Are there any park features missing that you think are of high interest? Which ones? \_\_\_\_\_

g. Could you rank the following animal groups by order of spotting preference (from 1 to 6)?

- Birds \_\_\_\_\_

- Reptiles \_\_\_\_\_

- Insects \_\_\_\_\_

- Small mammals (meerkat, mongoose, ground squirrel...)

\_\_\_\_\_

- Ungulates (gemsbok, springbok, eland...) \_\_\_\_\_

- Big cats \_\_\_\_\_

h. Are there any animal groups missing that you think are of high interest? Which ones? \_\_\_\_\_

i. For your route in the park today have you had any expectations which animals you would see in that area of the park? \_\_\_\_\_

j. Which animals did you hope to see/did you want to see?

---

**SECTION III: PREDATOR SIGHTINGS**

a. Did you see one of the following predators (give number, and locate on the map)?

|          | Lion | Cheetah | Leopard | Spotted Hyena | Wild dog |
|----------|------|---------|---------|---------------|----------|
| Number   |      |         |         |               |          |
| Distance |      |         |         |               |          |
| Number   |      |         |         |               |          |
| Distance |      |         |         |               |          |

At what distance from the car/road (suggest categories)?

a) directly next to car   b) less than 200 m   c) 500 m   d) more than 500 m

**SECTION IV: VEGETATION**

a. Was it easy to spot animals?

Why yes? \_\_\_\_\_

Why not? \_\_\_\_\_

b. Had vegetation density an influence on this? How?

\_\_\_\_\_

c. How would you describe vegetation density? (1-10, 1 being very dense/thick vegetation, 10 being open landscape) \_\_\_\_\_

d. How would you describe visibility? (1-10) \_\_\_\_\_

e. What would you say was the main vegetation type/landscape on your drive today?

(e.g. mainly bush/grass/tree; tree-grass mix etc.) \_\_\_\_\_

f. What did you expect vegetation/visibility/landscape to be like prior to this drive? Was this expectation met? \_\_\_\_\_

g. In your opinion – did vegetation contribute positively or negatively to your enjoyment today? Why positively, why negatively? \_\_\_\_\_

h. In general - what kind of vegetation/landscape in the park do you enjoy most?

\_\_\_\_\_

i. Which type makes game viewing most enjoyable? \_\_\_\_\_
