# Supplementary material for: The importance of vegetation density for tourists’ wildlife viewing experience and satisfaction in African savannah ecosystems
Source: PLOS journal article supplement (doi:10.1371/journal.pone.0185793), 2017-09-28
Supplement: S4 (10.1371/journal.pone.0185793.s004) [file journal.pone.0185793.s004.pdf]

**S1 Table. Correlation matrix between potential predictor variables for the Boosted Regression Tree models.** h\_short = short vegetation height category; h\_intert = intermediate vegetation height category; h\_tall = high vegetation height category; mammals = mammal density perceived by tourists; PC1-2 = principal components 1-2 (accounting for > 60% of the variance) from the Principal Component Analysis on vegetation variables.

|             | visibility   | bare_ground | short_grass | rock  | burned | grass        | shrubs       | trees        | h_short      | h_inter      | h_tall       | PC1   | PC2  | mammals |
|-------------|--------------|-------------|-------------|-------|--------|--------------|--------------|--------------|--------------|--------------|--------------|-------|------|---------|
| visibility  | 1            |             |             |       |        |              |              |              |              |              |              |       |      |         |
| bare_ground | <b>0.70</b>  | 1           |             |       |        |              |              |              |              |              |              |       |      |         |
| short_grass | 0.39         | 0.43        | 1           |       |        |              |              |              |              |              |              |       |      |         |
| rock        | 0.48         | 0.48        | 0.16        | 1     |        |              |              |              |              |              |              |       |      |         |
| burned      | -0.09        | -0.17       | -0.21       | -0.13 | 1      |              |              |              |              |              |              |       |      |         |
| grass       | -0.02        | -0.57       | -0.56       | -0.21 | 0.19   | 1            |              |              |              |              |              |       |      |         |
| shrubs      | <b>-0.73</b> | -0.50       | -0.55       | -0.37 | -0.12  | -0.07        | 1            |              |              |              |              |       |      |         |
| trees       | <b>-0.69</b> | -0.31       | -0.32       | -0.14 | -0.06  | -0.29        | 0.54         | 1            |              |              |              |       |      |         |
| h_short     | <b>0.76</b>  | 0.49        | 0.56        | 0.12  | 0.04   | 0.12         | <b>-0.85</b> | <b>-0.81</b> | 1            |              |              |       |      |         |
| h_inter     | <b>-0.68</b> | -0.50       | -0.57       | -0.05 | 0.01   | -0.01        | <b>0.85</b>  | 0.55         | <b>-0.93</b> | 1            |              |       |      |         |
| h_tall      | <b>-0.72</b> | -0.39       | -0.44       | -0.17 | -0.09  | -0.21        | <b>0.69</b>  | <b>0.95</b>  | <b>-0.90</b> | <b>0.67</b>  | 1            |       |      |         |
| PC1         | <b>0.83</b>  | <b>0.67</b> | <b>0.69</b> | 0.33  | -0.05  | -0.12        | <b>-0.87</b> | <b>-0.75</b> | <b>0.95</b>  | <b>-0.88</b> | <b>-0.85</b> | 1     |      |         |
| PC2         | -0.08        | <b>0.51</b> | 0.21        | 0.30  | -0.29  | <b>-0.89</b> | 0.32         | 0.45         | -0.36        | 0.27         | 0.41         | -0.13 | 1    |         |
| mammals     | 0.39         | <b>0.60</b> | <b>0.73</b> | 0.29  | -0.20  | <b>-0.66</b> | -0.35        | -0.20        | 0.40         | -0.41        | -0.32        | 0.57  | 0.49 | 1       |
