# Supplementary material for: The importance of vegetation density for tourists’ wildlife viewing experience and satisfaction in African savannah ecosystems
Source: PLOS journal article supplement (doi:10.1371/journal.pone.0185793), 2017-09-28
Supplement: S5 (10.1371/journal.pone.0185793.s005) [file journal.pone.0185793.s005.pdf]

**S2 Table. List of large mammal species recorded during transect counts.** List of all larger mammal species of predators and ungulates recorded during road transects in Etosha, Chobe, Kruger National Parks and Hluhluwe-Imfolozi Game Reserve. Common and scientific names are based on the Atlas of Mammals of Africa (volumes V & VI, Kingdon & Hoffmann 2013).

| English name                   | Scientific name                   | Etosha | Chobe | Kruger | Hluhluwe-<br>Imfolozi |
|--------------------------------|-----------------------------------|--------|-------|--------|-----------------------|
| <b>African lion</b>            | <i>Panthera leo</i>               | X      | X     | X      | X                     |
| <b>African leopard</b>         | <i>Panthera pardus</i>            | X      | X     | X      | X                     |
| <b>Cheetah</b>                 | <i>Acinonyx<br/>jubatus</i>       | X      | X     | X      | X                     |
| <b>Spotted hyena</b>           | <i>Crocuta crocuta</i>            | X      | X     | X      | X                     |
| <b>Wild dog</b>                | <i>Lycaon pictus</i>              | -      | X     | X      | X                     |
| <b>African elephant</b>        | <i>Loxodonta<br/>africana</i>     | X      | X     | X      | X                     |
| <b>African buffalo</b>         | <i>Syncerus caffer</i>            | -      | X     | X      | X                     |
| <b>Black rhinoceros</b>        | <i>Diceros bicornis</i>           | X      | -     | -      | -                     |
| <b>Blue wildebeest</b>         | <i>Connochaetes<br/>taurinus</i>  | X      | X     | X      | X                     |
| <b>Bushbuck</b>                | <i>Tragelaphus<br/>scriptus</i>   | -      | -     | X      | X                     |
| <b>Common<br/>hippopotamus</b> | <i>Hippopotamus<br/>amphibius</i> | -      | X     | *      | -                     |
| <b>Common duiker</b>           | <i>Sylvicapra<br/>grimmia</i>     | -      | -     | X      | X                     |
| <b>Common warthog</b>          | <i>Phacochoerus<br/>africanus</i> | X      | X     | X      | X                     |

|                          |                                 |   |   |   |   |
|--------------------------|---------------------------------|---|---|---|---|
| <b>Gemsbok</b>           | <i>Oryx gazella</i>             | X | - | - | - |
| <b>Giraffe</b>           | <i>Giraffa camelopardalis</i>   | X | X | X | X |
| <b>Greater kudu</b>      | <i>Tragelaphus strepsiceros</i> | X | X | X | X |
| <b>Impala</b>            | <i>Aepyceros melampus</i>       | X | X | X | X |
| <b>Klipspringer</b>      | <i>Oreotragus oreotragus</i>    | - | - | X | - |
| <b>Mountain reedbuck</b> | <i>Redunca fulvorufula</i>      | - | - | X | - |
| <b>Nyala</b>             | <i>Tragelaphus angasii</i>      | - | - | - | X |
| <b>Plains zebra</b>      | <i>Equus quagga</i>             | X | X | X | X |
| <b>Puku</b>              | <i>Kobus vardonii</i>           | - | X | - | - |
| <b>Red duiker</b>        | <i>Cephalophus natalensis</i>   | - | - | - | X |
| <b>Red hartebeest</b>    | <i>Alcelaphus buselaphus</i>    | X | - | - | - |
| <b>Red lechwe</b>        | <i>Kobus leche</i>              | - | X | - | - |
| <b>Roan antelope</b>     | <i>Hippotragus equinus</i>      | - | X | - | - |
| <b>Sable antelope</b>    | <i>Hippotragus niger</i>        | - | X | X | - |
| <b>Southern reedbuck</b> | <i>Redunca arundinum</i>        | - | - | X | - |
| <b>Springbok</b>         | <i>Antidorcas marsupialis</i>   | X | - | - | - |

|                         |                                  |   |   |   |   |
|-------------------------|----------------------------------|---|---|---|---|
| <b>Steenbok</b>         | <i>Raphicerus<br/>campestris</i> | X | X | X | - |
| <b>Tsessebe</b>         | <i>Damaliscus<br/>lunatus</i>    | X | - | - | - |
| <b>Waterbuck</b>        | <i>Kobus<br/>ellipsiprymnus</i>  | - | X | X | - |
| <b>White rhinoceros</b> | <i>Ceratotherium<br/>simum</i>   | - | - | X | X |

---

\*Hippos were excluded in Kruger for methodological reasons.
