# Supplementary material for: The importance of vegetation density for tourists’ wildlife viewing experience and satisfaction in African savannah ecosystems
Source: PLOS journal article supplement (doi:10.1371/journal.pone.0185793), 2017-09-28
Supplement: S6 (10.1371/journal.pone.0185793.s006) [file journal.pone.0185793.s006.pdf]

**S3 Table. Principal Component Analysis loadings.** Loadings of the variables on each of the two first components of the Principal Component Analysis performed on the seven vegetation types and three vegetation heights ('height\_short', 'height\_inter' and 'height\_tall' stand for short, intermediate and tall vegetation respectively). PC1 represents a measure of vegetation openness and PC2 represents the transition in vegetation from grasslands to woodlands.

|              | PC1   | PC2   |
|--------------|-------|-------|
| Bare ground  | 0.30  | 0.40  |
| Short grass  | 0.28  | 0.34  |
| Rock         | 0.15  | 0.37  |
| Burned       | 0.01  | -0.20 |
| Grass        | 0.02  | -0.65 |
| Shrubs       | -0.38 | 0.08  |
| Trees        | -0.36 | 0.22  |
| Height_short | 0.48  | -0.12 |
| Height_inter | -0.39 | -0.00 |
| Height_tall  | -0.40 | 0.24  |
