# Supplementary material for: The importance of vegetation density for tourists’ wildlife viewing experience and satisfaction in African savannah ecosystems
Source: PLOS journal article supplement (doi:10.1371/journal.pone.0185793), 2017-09-28
Supplement: S8 (10.1371/journal.pone.0185793.s008) [file journal.pone.0185793.s008.pdf]

**S5 Table. Results of alternative Boosted Regression Trees models including shrub and grass variables instead of PC1 and PC2.** PA = protected area; Mammals = perceived mammal densities along road transects; tc = tree complexity; lr = learning rate; bf = bag fraction; CV-deviance = Cross-Validated deviance; Performance = 1 – (residual deviance / total deviance).

| Model               | Predictor | Influence | Threshold | Conf. Interval | tc | lr    | bf   | CV-deviance (SE) | Performance |
|---------------------|-----------|-----------|-----------|----------------|----|-------|------|------------------|-------------|
| <b>Attitude</b>     | shrub     | 47.44     | 31.59     | [30.78; 32.4]  | 1  | 0.001 | 0.5  | 1.06 (0.01)      | 0.03        |
|                     | grass     | 16.06     | 32.52     | [30.62; 34.42] |    |       |      |                  |             |
|                     | PA        | 36.50     |           |                |    |       |      |                  |             |
| <b>Easiness</b>     | Mammals   | 28.53     | 45.86     | [41.48; 50.25] | 2  | 0.005 | 0.75 | 0.96 (0.02)      | 0.09        |
|                     | shrub     | 11.41     | 31.24     | [29.70; 32.78] |    |       |      |                  |             |
|                     | grass     | 6.96      | 33.34     | [30.69; 35.99] |    |       |      |                  |             |
|                     | PA        | 53.10     |           |                |    |       |      |                  |             |
| <b>Satisfaction</b> | Mammals   | 67.71     | 30.53     | [27.77; 33.30] | 1  | 0.001 | 0.75 | 5.10 (0.28)      | 0.04        |
|                     | shrub     | 22.81     | 42.72     | [38.35; 47.1]  |    |       |      |                  |             |
|                     | grass     | 8.81      | 37.82     | [33.57; 42.07] |    |       |      |                  |             |
|                     | PA        | 0.66      |           |                |    |       |      |                  |             |
